# Supplementary material
Source: PubMed Central journal article supplement (PMC2752070)
Supplement: JCI38746sd.pdf [file JCI38746sd.pdf]

Figure S1

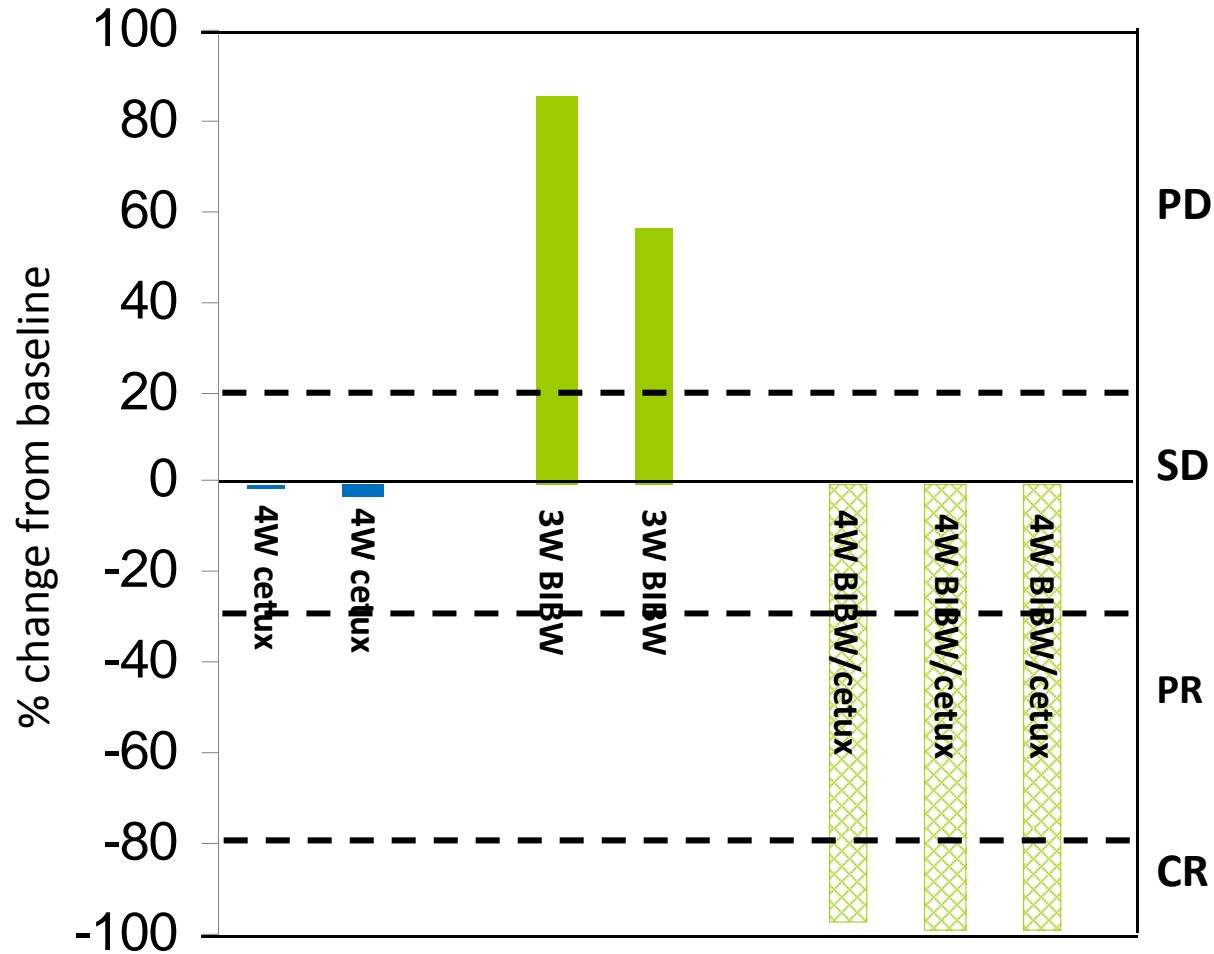

**Figure S1. Change in radiographic tumor volume from baseline by treatment for individual lung tumor-bearing C/T790M animals.** Graphed are the percent change in tumor volume calculated for individual animals pre- and post-treatment with cetuximab (cetux), BIBW-2992 (BIBW), or combinations of BIBW-2992 with cetuximab. Cutoffs of 20% growth, 30% shrinkage, and 80% shrinkage (dotted lines) are shown to delineate progressive disease (PD), partial response (PR), and complete response (CR), respectively. Mice that displayed less than 20% growth and less than 30% shrinkage in tumor volume were considered to have stable disease (SD). See methods for details.

Figure S2

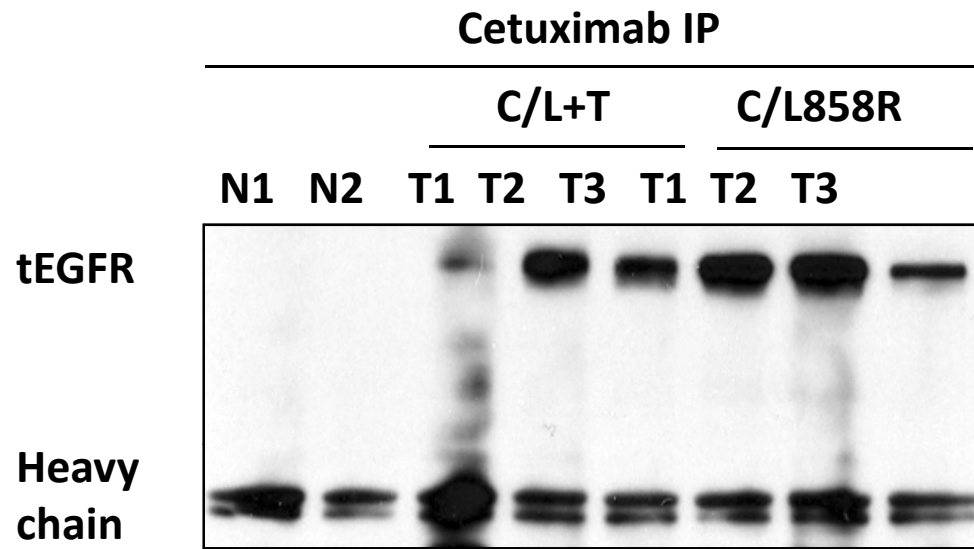

**Figure S2. Cetuximab binds to EGFR<sup>L858R</sup> and EGFR<sup>L858R+T790M</sup>.** Tumor cell lysates from C/L858R and C/L+T mice were immunoprecipitated with cetuximab and then subjected to immunoblotting with an antibody against total EGFR. N – normal lung; T – tumor.

| Mouse | Genotype | Treatment                     | Response | Histology                     |
|-------|----------|-------------------------------|----------|-------------------------------|
| 1     | C/L858R  | BIBW-2992 (2W)                | CR       | No tumor                      |
| 2     | C/L858R  | BIBW-2992 (2W)                | CR       | No tumor                      |
| 3     | C/L858R  | BIBW-2992 (2W)                | CR       | No tumor                      |
| 4     | C/L858R  | BIBW-2992 (2W)                | CR       | No tumor                      |
|       |          |                               |          |                               |
| 1     | C/L+T    | BIBW-2992 (1W)                | SD       | Viable tumor                  |
| 2     | C/L+T    | BIBW-2992 (2W)                | SD       | Viable tumor                  |
| 3     | C/L+T    | BIBW-2992 (2W)                | SD       | Viable tumor                  |
| 4     | C/L+T    | BIBW-2992 (3W)                | SD       | Viable tumor                  |
| 5     | C/L+T    | BIBW-2992 (3W)                | SD       | Viable tumor                  |
| 6     | C/L+T    | BIBW-2992 (4W)                | PD       | Viable tumor                  |
|       |          |                               |          |                               |
| 1     | C/L+T    | Cetuximab (2W) +<br>BIBW-2992 | CR       | No tumor                      |
| 2     | C/L+T    | Cetuximab (4W) +<br>BIBW-2992 | PR       | Necrotic tumor<br>nodules     |
| 3     | C/L+T    | Cetuximab (4W) +<br>BIBW-2992 | CR       | No tumor                      |
| 4     | C/L+T    | Cetuximab (4W) +<br>BIBW-2992 | CR       | No tumor                      |
| 5     | C/L+T    | Cetuximab (4W) +<br>BIBW-2992 | CR       | No tumor                      |
| 6     | C/L+T    | Cetuximab (4W) +<br>BIBW-2992 | CR       | No tumor                      |
| 7     | C/L+T    | Cetuximab (4W) +<br>BIBW-2992 | CR       | No tumor                      |
| 8     | C/L+T    | Cetuximab (4W) +<br>BIBW-2992 | CR       | Scant viable<br>tumor nodules |

**Table S1. Summary of lung tumor-bearing C/L858R and C/L+T bitransgenic mice treated with BIBW-2992 alone or in combination with cetuximab.**

Responses assessed by MRI; PD – progressive disease, SD – stable disease; PR – partial response; CR – complete response. See methods for details. nd – not determined. W – weeks.

| <b>Mouse</b> | <b>Genotype</b> | <b>Treatment</b>              | <b>Response</b> | <b>Histology</b> |
|--------------|-----------------|-------------------------------|-----------------|------------------|
| 1            | C/T790M         | BIBW-2992 (3W)                | PD              | Viable tumor     |
| 2            | C/T790M         | BIBW-2992 (3W)                | PD              | Viable tumor     |
|              |                 |                               |                 |                  |
| 1            | C/T790M         | Cetuximab (4W)                | SD              | Viable tumor     |
| 2            | C/T790M         | Cetuximab (4W)                | SD              | Viable tumor     |
|              |                 |                               |                 |                  |
| 1            | C/T790M         | Cetuximab (4W) +<br>BIBW-2992 | CR              | No tumor         |
| 2            | C/T790M         | Cetuximab (4W) +<br>BIBW-2992 | CR              | No tumor         |
| 3            | C/T790M         | Cetuximab (4W) +<br>BIBW-2992 | CR              | No tumor         |

**Table S2. Summary of lung tumor-bearing C/T790M bitransgenic mice treated with BIBW-2992 alone, cetuximab alone, or BIBW-2992 plus cetuximab.**

Responses assessed by MRI; PD – progressive disease, SD – stable disease; PR – partial response; CR – complete response. See methods for details.

|             | <b>C/L+T vs NORMAL</b> |            |
|-------------|------------------------|------------|
| <b>Gene</b> | <b>FC</b>              | <b>FDR</b> |
| <i>Prm1</i> | 287.08                 | 2.75E-09   |
| <i>Prm1</i> | 260.91                 | 3.36E-09   |
| <i>Kng1</i> | 128.20                 | 1.24E-07   |
| <i>Dlk1</i> | 100.50                 | 4.78E-05   |
| <b>Ereg</b> | 90.88                  | 5.61E-09   |
| <i>Gtl2</i> | 58.60                  | 4.10E-06   |
| <b>Areg</b> | 29.28                  | 1.33E-07   |
| <i>Gtl2</i> | 27.70                  | 2.56E-06   |
| <i>Gtl2</i> | 24.26                  | 6.68E-06   |
| <i>Gtl2</i> | 23.94                  | 7.06E-06   |

|                | <b>C/T790M vs NORMAL</b> |            |
|----------------|--------------------------|------------|
| <b>Gene</b>    | <b>FC</b>                | <b>FDR</b> |
| <i>Prm1</i>    | 348.81                   | 1.35E-13   |
| <i>Prm1</i>    | 327.21                   | 2.87E-13   |
| <i>Kng1</i>    | 187.55                   | 1.28E-11   |
| <i>Dlk1</i>    | 133.84                   | 2.24E-09   |
| <b>Ereg</b>    | 73.06                    | 3.20E-14   |
| <i>Gtl2</i>    | 46.31                    | 2.14E-09   |
| <i>Slc26a4</i> | 33.98                    | 1.41E-08   |
| <i>Gtl2</i>    | 32.88                    | 2.84E-11   |
| <i>Gtl2</i>    | 28.52                    | 4.12E-10   |
| <i>Gtl2</i>    | 28.43                    | 4.62E-10   |
| <b>Areg</b>    | 28.11                    | 1.00E-11   |

|                | <b>C/L858R vs NORMAL</b> |            |
|----------------|--------------------------|------------|
| <b>Gene</b>    | <b>FC</b>                | <b>FDR</b> |
| <i>Prm1</i>    | 689.29                   | 6.82E-10   |
| <i>Prm1</i>    | 625.20                   | 6.82E-10   |
| <i>Kng1</i>    | 65.39                    | 4.02E-07   |
| <i>Dlk1</i>    | 56.32                    | 0.000165   |
| <i>Ear1</i>    | 51.82                    | 1.07E-08   |
| <b>Ereg</b>    | 45.38                    | 4.52E-08   |
| <i>Gtl2</i>    | 43.97                    | 8.65E-06   |
| <i>Arg2</i>    | 26.07                    | 2.29E-06   |
| <i>Cd200r4</i> | 25.92                    | 2.34E-09   |
| <b>Areg</b>    | 24.15                    | 2.39E-07   |

**Table S3. Genes Most Highly Overexpressed in Tumors From Various EGFR Mutant Mice vs. Normal Lung.** FC – fold change; FDR – false discovery rate.

| Mouse | Genotype | Treatment                     | Response | Histology    |
|-------|----------|-------------------------------|----------|--------------|
| 1     | C/L858R  | Cetuximab (2W)                | CR       | No tumor     |
| 2     | C/L858R  | Cetuximab (2W)                | CR       | No tumor     |
| 3     | C/L858R  | Cetuximab (2W)                | CR       | No tumor     |
| 4     | C/L858R  | Cetuximab (2W)                | CR       | No tumor     |
| 5     | C/L858R  | Cetuximab (2W)                | CR       | No tumor     |
|       |          |                               |          |              |
| 1     | C/L+T    | Cetuximab (2W)                | SD       | nd           |
| 2     | C/L+T    | Cetuximab (2W)                | PR       | nd           |
| 3     | C/L+T    | Cetuximab (4W)                | SD       | Viable tumor |
| 4     | C/L+T    | Cetuximab (4W)                | SD       | Viable tumor |
| 5     | C/L+T    | Cetuximab (4W)                | SD       | Viable tumor |
| 6     | C/L+T    | Cetuximab (4W)                | SD       | Viable tumor |
| 7     | C/L+T    | Cetuximab (4W)                | PR       | nd           |
|       |          |                               |          |              |
| 1     | C/L+T    | Cetuximab (4W)<br>+ erlotinib | PD       | Viable tumor |
| 2     | C/L+T    | Cetuximab (4W)<br>+ erlotinib | SD       | Viable tumor |
| 3     | C/L+T    | Cetuximab (4W)<br>+ erlotinib | SD       | Viable tumor |
| 4     | C/L+T    | Cetuximab (4W)<br>+ erlotinib | PR       | Viable tumor |

**Table S4. Summary of lung tumor-bearing C/L858R and C/L+T bitransgenic mice treated with cetuximab alone or in combination with erlotinib.** Responses assessed by MRI; PD – progressive disease, SD – stable disease; PR – partial response; CR – complete response. See methods for details. nd – not determined. W – weeks.

| Mouse | Genotype | Treatment       | Response | Histology    |
|-------|----------|-----------------|----------|--------------|
| 1     | C/L+T    | Paclitaxel (4W) | PD       | Viable Tumor |
| 2     | C/L+T    | Paclitaxel (4W) | PD       | Viable Tumor |
| 3     | C/L+T    | Paclitaxel (4W) | PD       | Viable Tumor |
| 4     | C/L+T    | Paclitaxel (4W) | SD       | Viable Tumor |
| 5     | C/L+T    | Paclitaxel (4W) | SD       | Viable Tumor |
|       |          |                 |          |              |
| 1     | C/L+T    | Pemetrexed (2W) | PD       | Viable Tumor |
| 2     | C/L+T    | Pemetrexed (2W) | PD       | Viable Tumor |
| 3     | C/L+T    | Pemetrexed (2W) | PD       | Viable Tumor |
| 4     | C/L+T    | Pemetrexed (2W) | SD       | Viable Tumor |

**Table S5. Summary of lung tumor-bearing C/L+T bitransgenic mice treated with pemetrexed or paclitaxel.** Responses assessed by MRI; PD – progressive disease, SD – stable disease. See methods for details. W – weeks.
